# Supplementary material for: Etiology and Risk Factors of Acute Gastroenteritis in a Taipei Emergency Department: Clinical Features for Bacterial Gastroenteritis
Source: PubMed Central journal article supplement (PMC4808689; doi:10.2188/jea.je20150061), 2016-04-05
Supplement: je-26-216-s001.pdf [file je-26-216-s001.pdf]

**eTable 1.** Characteristics of participants with acute gastroenteritis in different etiologic groups

| Factors                                  | Pathogens        |                     |                    |                                 |                                 | Unknown<br>(n=230) | <i>p</i>            |
|------------------------------------------|------------------|---------------------|--------------------|---------------------------------|---------------------------------|--------------------|---------------------|
|                                          | Virus<br>(n=174) | Bacteria<br>(n=106) | Parasite<br>(n=21) | Co-infection                    |                                 |                    |                     |
|                                          |                  |                     |                    | Including<br>bacteria<br>(n=59) | Excluding<br>bacteria<br>(n=37) |                    |                     |
| Maximum frequency of diarrhea in one day |                  |                     |                    |                                 |                                 |                    |                     |
| Mean (SD)                                | 7.68 (9.44)      | 9.04 (6.03)         | 7.21 (2.92)        | 7.96 (5.07)                     | 6.92 (4.63)                     | 6.91 (5.39)        | 0.161               |
| Maximum frequency of vomiting in one day |                  |                     |                    |                                 |                                 |                    |                     |
| Mean (SD)                                | 4.39 (3.90)      | 3.76 (2.97)         | 3.43 (2.56)        | 3.53 (2.76)                     | 4.30 (3.08)                     | 3.89 (2.98)        | 0.750               |
| Mean illness duration                    |                  |                     |                    |                                 |                                 |                    |                     |
| Mean (SD)                                | 1.84 (2.31)      | 3.63 (3.72)         | 2.53 (2.48)        | 2.65 (3.36)                     | 2.67 (2.04)                     | 3.00 (5.09)        | 0.006 <sup>a</sup>  |
| WBC ( $\times 10^3$ count/ $\mu$ L)      |                  |                     |                    |                                 |                                 |                    |                     |
| Mean (SD)                                | 10.83 (3.92)     | 11.41 (5.03)        | 9.95 (3.49)        | 12.10 (10.37)                   | 10.21 (4.04)                    | 10.80 (4.22)       | 0.355               |
| CRP (mg/L)                               |                  |                     |                    |                                 |                                 |                    |                     |
| Mean (SD)                                | 15.39 (16.71)    | 25.85 (32.28)       | 15.80 (20.05)      | 17.30 (18.68)                   | 18.97(21.80)                    | 15.48 (22.68)      | 0.005 <sup>b</sup>  |
| Positive fecal leukocyte                 | 40 (25.3%)       | 52 (51.0%)          | 2 (9.5%)           | 22 (38.6%)                      | 10 (27.8%)                      | 84 (36.5%)         | <0.001 <sup>c</sup> |
| Positive fecal occult blood              | 62 (35.6%)       | 69 (65.1%)          | 5 (23.8%)          | 19 (32.2%)                      | 16 (43.2%)                      | 96 (26.9%)         | <0.001 <sup>c</sup> |

SD, standard deviation.

<sup>a</sup> bacteria vs. virus group: F value=10.6,  $p=0.001$  in mean illness duration; unknown vs virus group: F value=12.8,  $p<0.001$  in mean illness duration;

<sup>b</sup> bacteria vs. virus group: F value=13.8,  $p<0.001$  in CRP; F value=27.3,  $p<0.001$  in fecal occult blood;

<sup>c</sup> bacteria vs. virus group: chi-square=18.7,  $p<0.001$  in fecal pus cell and chi-square=24.4,  $p<0.001$  in fecal occult blood;

**eTable 1.** Characteristics of participants with acute gastroenteritis in different etiologic groups (continued)

| Symptom distribution<br>Number (%) | Pathogens        |                     |                    |                                 |                                 | Unknown<br>(n=230) | <i>p</i>            |
|------------------------------------|------------------|---------------------|--------------------|---------------------------------|---------------------------------|--------------------|---------------------|
|                                    | Virus<br>(n=174) | Bacteria<br>(n=106) | Parasite<br>(n=21) | Co-infection                    |                                 |                    |                     |
|                                    |                  |                     |                    | Including<br>bacteria<br>(n=59) | Excluding<br>bacteria<br>(n=37) |                    |                     |
| Diarrhea                           | 151<br>(86.8)    | 92<br>(86.8)        | 19<br>(90.5)       | 46<br>(78.0)                    | 31<br>(83.8)                    | 194<br>(84.4)      | 0.6076              |
| Abdominal pain                     | 90<br>(51.7)     | 67<br>(63.2)        | 17<br>(81.0)       | 32<br>(54.2)                    | 24<br>(64.9)                    | 136<br>(59.1)      | 0.0841              |
| Vomiting                           | 88<br>(50.6)     | 33<br>(31.1)        | 7<br>(33.3)        | 24<br>(40.7)                    | 10<br>(40.5)                    | 89<br>(38.7)       | 0.0363 <sup>d</sup> |
| Nausea                             | 68<br>(39.1)     | 33<br>(31.1)        | 6<br>(28.6)        | 20<br>(33.9)                    | 17<br>(46.0)                    | 91<br>(39.6)       | 0.4659              |
| Abdominal bloating                 | 56<br>(32.2)     | 27<br>(25.5)        | 7<br>(33.3)        | 14<br>(23.7)                    | 18<br>(48.7)                    | 84<br>(36.5)       | 0.0630              |
| Poor appetite                      | 54<br>(31.0)     | 28<br>(26.4)        | 7<br>(33.3)        | 11<br>(18.6)                    | 13<br>(35.1)                    | 74<br>(32.2)       | 0.3620              |
| Myalgia                            | 61<br>(35.1)     | 33<br>(31.1)        | 4<br>(19.1)        | 17<br>(28.8)                    | 13<br>(35.1)                    | 86<br>(24.1)       | 0.1026              |
| Fever                              | 31<br>(17.8)     | 26<br>(24.5)        | 2<br>(9.52)        | 10<br>(17.0)                    | 5<br>(13.5)                     | 39<br>(17.0)       | 0.4407              |

<sup>d</sup> bacteria vs. virus group: chi-square =10.42, *p*=0.0012; unknown vs virus group: chi-square =5.87, *p*=0.015
